# Supplementary material
Source: publisher site journal article supplement (https://www.dovepress.com/article/380693)
Supplement: Supplementary file 1 [file get_supplementary_file.php]

\* The survey items permission and acknowledgment: see last page

Date: \_\_\_\_ \ \_\_\_\_ \ 20 \_\_\_\_ Date of admission: \_\_\_\_ \ \_\_\_\_ \ 20 \_\_\_\_ Duration of admission: \_\_\_\_ Days

Department:

| Ward type |         |     | No. of beds | Total No. of patients |
|-----------|---------|-----|-------------|-----------------------|
| Surgical  | Medical | ICU |             |                       |

|                  |                                      |                              |                                    |
|------------------|--------------------------------------|------------------------------|------------------------------------|
| Mode of payment: | Self-funded <input type="checkbox"/> | MUH <input type="checkbox"/> | Insurance <input type="checkbox"/> |
|------------------|--------------------------------------|------------------------------|------------------------------------|

| Patient # | Age | Sex | Living situation |        |      |
|-----------|-----|-----|------------------|--------|------|
|           |     |     | low              | Medium | High |

| Allergies history |    | If Yes to which Drug |
|-------------------|----|----------------------|
| Yes               | No |                      |

| Diagnosis        |    |     |         |       |
|------------------|----|-----|---------|-------|
| Other conditions | DM | HTN | Hepatic | Renal |

| Indication of antibiotic | <u>Infection</u> | <u>Prophylaxis</u> |
|--------------------------|------------------|--------------------|
|                          |                  |                    |

**1. If the indication is infection:**

|                                        |                                       |
|----------------------------------------|---------------------------------------|
| Community-acquired < 48 h of admission | Hospital-acquired > 48 h of admission |
|----------------------------------------|---------------------------------------|

| Anatomical site of infection | Respiratory | Intra-abdominal         | UT  |
|------------------------------|-------------|-------------------------|-----|
|                              | Gynecology  | Skin, Bone, Joint (SBJ) |     |
|                              | ENT         | Cardiac                 | CNS |
|                              | Undefined   |                         |     |

| Is the infection verified | Yes | culture | imaging | laboratory | pus |
|---------------------------|-----|---------|---------|------------|-----|
|                           | No  |         |         |            |     |

**2. If the indication is Prophylaxis: Name the indication for antimicrobial prophylaxis**

|          |         |
|----------|---------|
| Surgical | Medical |
|----------|---------|

**For patients undergoing a surgical procedure:**

|                                                                                |            |           |                |
|--------------------------------------------------------------------------------|------------|-----------|----------------|
| Type of the operation                                                          | Elective   | Emergency |                |
| Timing of the first dose of prophylactic antibiotic to the day of the incision | Day before | Same day  | After Incision |
| Duration of prophylactic antibiotic (day)                                      | < 24 hrs.  | = 24 hrs. | > 24 hrs.      |

|                       |             |                 |
|-----------------------|-------------|-----------------|
| <b>Liver function</b> | compensated | Not compensated |
|-----------------------|-------------|-----------------|

|                                                                   |  |
|-------------------------------------------------------------------|--|
| <b>Used to determine appropriate drug dosing concerning e.GFR</b> |  |
| S. creatinine mg\dl                                               |  |
| e.GFR (ckd epi formula) ml\min\1.75m <sup>2</sup>                 |  |

|                                |     |     |       |      |
|--------------------------------|-----|-----|-------|------|
| <b>No. of antibiotics used</b> | One | Two | Three | more |
|--------------------------------|-----|-----|-------|------|

| Antibiotics Group | Antibiotics Name | Antibiotics regimen<br>(__ (g.) mg \_ hour) | Dosage form |    | Duration (Days) |
|-------------------|------------------|---------------------------------------------|-------------|----|-----------------|
|                   |                  |                                             | Oral        | IV |                 |
|                   |                  |                                             | Oral        | IV |                 |
|                   |                  |                                             | Oral        | IV |                 |
|                   |                  |                                             | Oral        | IV |                 |
|                   |                  |                                             | Oral        | IV |                 |
|                   |                  |                                             | Oral        | IV |                 |

| Is there antibiotic switching |    | If yes, was it based on cultural results? |    |
|-------------------------------|----|-------------------------------------------|----|
| Yes                           | No | Yes                                       | No |

|                   |                                                                                                                                                                                                                                                                                                                                                                                                                                                                                                                                                                                                                                                                       |
|-------------------|-----------------------------------------------------------------------------------------------------------------------------------------------------------------------------------------------------------------------------------------------------------------------------------------------------------------------------------------------------------------------------------------------------------------------------------------------------------------------------------------------------------------------------------------------------------------------------------------------------------------------------------------------------------------------|
| <b>Penicillin</b> | <p>Natural penicillins</p> <ul style="list-style-type: none"> <li>• Penicillin G (Benzylpenicillin)</li> <li>• Penicillin V</li> </ul> <p>Antistaphylococcal penicillins (penicillinase-resistant penicillins)</p> <ul style="list-style-type: none"> <li>• Cloxacillin</li> <li>• Dicloxacillin</li> <li>• Oxacillin</li> </ul> <p>Aminopenicillins ± B-lactamase inhibitor</p> <ul style="list-style-type: none"> <li>• Ampicillin (Unasyn)</li> <li>• Amoxicillin (Augmentin)</li> </ul> <p>Extended-spectrum penicillins: (Antipseudomonals)</p> <ul style="list-style-type: none"> <li>• Carbenicillin</li> <li>• Ticarcillin</li> <li>• Piperacillin</li> </ul> |
|-------------------|-----------------------------------------------------------------------------------------------------------------------------------------------------------------------------------------------------------------------------------------------------------------------------------------------------------------------------------------------------------------------------------------------------------------------------------------------------------------------------------------------------------------------------------------------------------------------------------------------------------------------------------------------------------------------|

|                          |                                                                                                                                                                 |
|--------------------------|-----------------------------------------------------------------------------------------------------------------------------------------------------------------|
| <b>Carbapenems</b>       | Meropenem<br>Imipenem                                                                                                                                           |
| <b>Cephalosporin</b>     | 1 <sup>st</sup> generation <ul style="list-style-type: none"> <li>• Cefadroxil</li> <li>• Cephalexin</li> <li>• Cephadrine</li> </ul>                           |
|                          | 2 <sup>nd</sup> generation <ul style="list-style-type: none"> <li>• Cefuroxime</li> <li>• Cefoxitin</li> <li>• Cefprozil</li> <li>• Cefaclor</li> </ul>         |
|                          | 3 <sup>rd</sup> generation <ul style="list-style-type: none"> <li>• Ceftriaxone</li> <li>• Ceftazidime</li> <li>• Cefoperazone</li> <li>• Cefotaxime</li> </ul> |
|                          | 4 <sup>th</sup> generation      Cefepime (Maxipeme, Pimfast, Wincef)                                                                                            |
| <b>Monobactam</b>        | Aztreonam                                                                                                                                                       |
| <b>Glycopeptides</b>     | <ul style="list-style-type: none"> <li>• Vancomycin</li> <li>• Teicoplanin (Targocid)</li> </ul>                                                                |
| <b>aminoglycosides</b>   | <ul style="list-style-type: none"> <li>• Gentamycin</li> <li>• Neomycin</li> <li>• Amikacin</li> <li>• Tobramycin</li> </ul>                                    |
| <b>Tetracycline</b>      | <ul style="list-style-type: none"> <li>• Doxycycline</li> <li>• Tetracyclin</li> <li>• Tigecycline</li> </ul>                                                   |
| <b>Oxazolidonones :</b>  | Linezolid                                                                                                                                                       |
| <b>Macrolides</b>        | <ul style="list-style-type: none"> <li>• Erythromycin</li> <li>• Azithromycin</li> <li>• Clarithromycin</li> </ul>                                              |
| <b>lincosamides</b>      | <ul style="list-style-type: none"> <li>• Clindamycin</li> <li>• Lincomycin</li> </ul>                                                                           |
| <b>Fluroquinolone</b>    | <ul style="list-style-type: none"> <li>• Ciprofloxacin</li> <li>• Levofloxacin</li> </ul>                                                                       |
| <b>Sulfonamides</b>      | Sulfamethoxazole + trimethoprim (Cotrimoxazole)<br>Sulfasalazine                                                                                                |
| <b>Metronidazole</b>     |                                                                                                                                                                 |
| <b>Azole derivatives</b> | <ul style="list-style-type: none"> <li>• Fluconazole</li> <li>• Itraconazole</li> <li>• Voriconazole</li> </ul>                                                 |

**Other medications for possible drug-drug interactions**

| Drug Group | Drug Name | Drug regimen<br>(__ (g.) mg \_ hour) | Dosage form |    |    | Duration  |         |
|------------|-----------|--------------------------------------|-------------|----|----|-----------|---------|
|            |           |                                      | oral        | IV | SC | Temporary | Chronic |
|            |           |                                      |             |    |    |           |         |
|            |           |                                      |             |    |    |           |         |
|            |           |                                      |             |    |    |           |         |
|            |           |                                      |             |    |    |           |         |
|            |           |                                      |             |    |    |           |         |
|            |           |                                      |             |    |    |           |         |
|            |           |                                      |             |    |    |           |         |
|            |           |                                      |             |    |    |           |         |
|            |           |                                      |             |    |    |           |         |
|            |           |                                      |             |    |    |           |         |

Regarding drug-drug interactions, we will stress the following list:

| Enzyme inducers                                                                                                   | Enzyme inhibitors                                                                                                                                                           | Drugs with a narrow therapeutic index            |
|-------------------------------------------------------------------------------------------------------------------|-----------------------------------------------------------------------------------------------------------------------------------------------------------------------------|--------------------------------------------------|
| Rifampicin<br>Phenobarbitone<br>Phenytoin<br>Carbamazepine<br>Cigarette smoking<br>Sulphonylureas<br>Griseofulvin | Sodium valproate<br>Isoniazid<br>Cimetidine<br>Ketoconazole, Fluconazole<br>Chloramphenicol<br>Erythromycin<br>Sulfonamides<br>Ciprofloxacin<br>Omeprazole<br>Metronidazole | Digoxin<br>Phenytoin<br>Theophylline<br>Warfarin |

**\* Acknowledgement and reference:**

Reproduced with permission and modification from Ansari F, Erntell M, Goossens H, Davey P, Group EIIHCS. The European surveillance of antimicrobial consumption (ESAC) point-prevalence survey of antibacterial use in 20 European hospitals in 2006. *Clin Infect Dis.* 2009;49(10):1496-1504.14.
